# Supplementary material for: Increased Interleukin 18-Dependent Immune Responses Are Associated With Myopericarditis After COVID-19 mRNA Vaccination
Source: PubMed Central journal article supplement (PMC8894592; doi:10.3389/fimmu.2022.851620), 2022-02-18
Supplement: DataSheet_1.pdf [file DataSheet_1.pdf]

**Supplementary Table 1.** Multiplex cytokine analysis of the plasma from patient with myopericarditis after COVID-19 vaccine

| Soluble factors (ng/ml)                                                                      | Healthy controls (n=5, median) | Vaccine controls (n=5, median) | Patient day 3 (n=1) | Patient day 4 (n=1) |
|----------------------------------------------------------------------------------------------|--------------------------------|--------------------------------|---------------------|---------------------|
| <b>Increased in patient compared to both healthy and vaccine controls</b>                    |                                |                                |                     |                     |
| IL-18                                                                                        | 27.32                          | 109.18                         | 247.54              | 139.98              |
| IL-27                                                                                        | 467.30                         | 1747.30                        | 4556.30             | 1826.40             |
| CXCL9 (MIG)                                                                                  | 1077.30                        | 1780.28                        | 3951.15             | 2608.25             |
| CXCL10 (IP-10)                                                                               | 75.54                          | 57.95                          | 305.83              | 99.95               |
| <b>Increased in patient compared to healthy controls at a same level as vaccine controls</b> |                                |                                |                     |                     |
| IFN- $\gamma$                                                                                | 0.00                           | 15.92                          | 11.82               | 12.91               |
| IL-1Ra                                                                                       | 0.00                           | 24.16                          | 21.42               | 8.34                |
| IL-6                                                                                         | 0.00                           | 7.65                           | 12.15               | 3.99                |
| IL-7                                                                                         | 0.00                           | 1.55                           | 0.99                | 0.86                |
| IL-10                                                                                        | 1.21                           | 10.88                          | 10.64               | 14.10               |
| IL-12p40                                                                                     | 15.80                          | 56.99                          | 40.82               | 66.33               |
| IL-15                                                                                        | 0.00                           | 9.84                           | 5.31                | 3.03                |
| TNF- $\alpha$                                                                                | 4.16                           | 36.64                          | 20.31               | 28.53               |
| CCL4 (MIP-1 $\beta$ )                                                                        | 11.68                          | 24.93                          | 26.42               | 26.19               |
| <b>Increased in patient compared to healthy controls but lower than vaccine controls</b>     |                                |                                |                     |                     |
| IFN- $\alpha$                                                                                | 0.00                           | 43.30                          | 2.70                | 0.00                |
| IL-1 $\alpha$                                                                                | 0.00                           | 197.11                         | 26.46               | 17.89               |
| IL-1 $\beta$                                                                                 | 0.00                           | 8.26                           | 0.19                | 0.00                |
| IL-2                                                                                         | 0.00                           | 1.14                           | 0.31                | 0.26                |
| IL-8                                                                                         | 1.27                           | 23.45                          | 2.09                | 3.12                |
| IL-9                                                                                         | 0.00                           | 161.22                         | 74.45               | 72.69               |
| IL-12p70                                                                                     | 0.00                           | 4.82                           | 0.49                | 0.61                |
| IL-17A                                                                                       | 0.00                           | 2.93                           | 0.42                | 0.39                |
| IL-17E/IL-25                                                                                 | 205.36                         | 3759.12                        | 437.43              | 171.12              |
| IL-17F                                                                                       | 0.00                           | 1679.68                        | 62.38               | 65.94               |
| IL-22                                                                                        | 0.00                           | 230.45                         | 28.36               | 25.52               |
| TNF- $\beta$                                                                                 | 0.00                           | 17.82                          | 0.91                | 0.91                |
| CCL3 (MIP-1 $\alpha$ )                                                                       | 0.00                           | 85.27                          | 16.01               | 21.37               |
| CCL7 (MCP-3)                                                                                 | 0.00                           | 45.48                          | 12.05               | 17.76               |
| CXCL1 (GRO $\alpha$ )                                                                        | 2.38                           | 25.45                          | 3.02                | 2.43                |
| EGF                                                                                          | 0.00                           | 589.59                         | 9.92                | 7.43                |
| FGF-2                                                                                        | 0.00                           | 250.29                         | 55.14               | 61.12               |
| G-CSF                                                                                        | 0.00                           | 18.84                          | 7.95                | 0.41                |
| M-CSF                                                                                        | 0.00                           | 645.58                         | 113.32              | 13.65               |
| PDGF-AA                                                                                      | 100.75                         | 11535.95                       | 440.48              | 118.87              |
| PDGF-AB/BB                                                                                   | 1821.33                        | 86247.27                       | 5663.03             | 2826.79             |
| TGF- $\alpha$                                                                                | 0.00                           | 116.01                         | 5.11                | 5.38                |
| VEGF-A                                                                                       | 0.00                           | 75.60                          | 6.23                | 3.48                |
| sCD40L                                                                                       | 0.00                           | 545.34                         | 121.03              | 63.51               |
| <b>Decreased in patient compared to healthy controls but higher than vaccine controls</b>    |                                |                                |                     |                     |
| Eotaxin                                                                                      | 343.23                         | 58.13                          | 154.25              | 150.70              |
| <b>No difference between patient and healthy controls</b>                                    |                                |                                |                     |                     |
| IL-3                                                                                         | 0.00                           | 0.00                           | 0.00                | 0.00                |
| IL-4                                                                                         | 0.00                           | 1.44                           | 0.00                | 0.00                |
| IL-5                                                                                         | 2.61                           | 7.01                           | 1.59                | 1.38                |
| IL-13                                                                                        | 0.00                           | 14.52                          | 0.00                | 0.00                |
| CCL2 (MCP-1)                                                                                 | 409.14                         | 669.43                         | 449.84              | 404.66              |
| CCL5 (Rantes)                                                                                | 791.12                         | 3777.68                        | 1273.50             | 870.09              |
| CCL22 (MDC)                                                                                  | 717.81                         | 1304.05                        | 592.89              | 571.76              |
| CX3CL1 (Fractalkine)                                                                         | 24.59                          | 101.29                         | 43.79               | 46.08               |
| FLT-3L                                                                                       | 20.75                          | 131.10                         | 30.86               | 31.42               |
| GM-CSF                                                                                       | 0.00                           | 0.00                           | 0.00                | 0.00                |

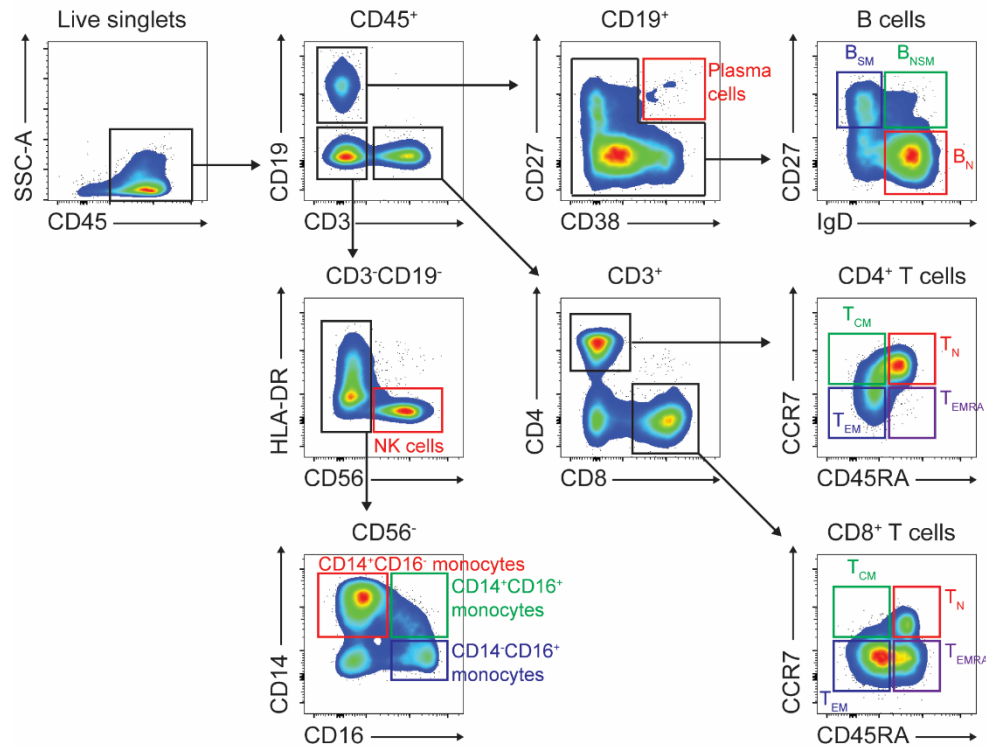

**Supplementary Figure 1.** Gating strategy for flow cytometry analysis of patient PBMC.

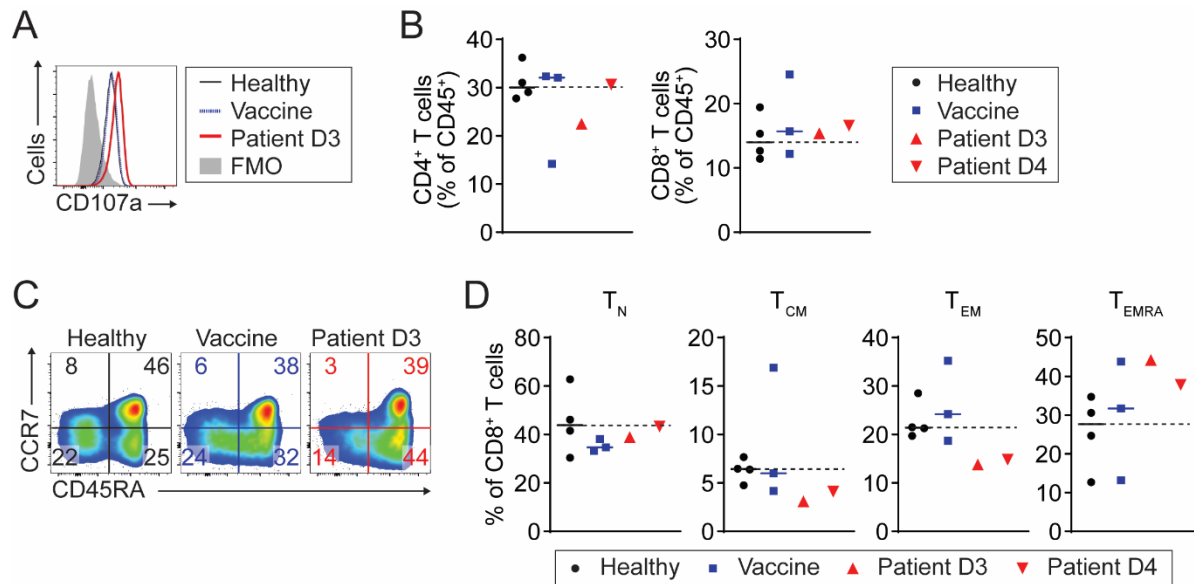

**Supplementary Figure 2.** Activated circulating T cells in patient with myopericarditis after COVID-19 mRNA vaccine. PMBC was isolated from the patient with myopericarditis on days 3 (D3) and 4 (D4) after COVID-19 mRNA vaccination. For flow cytometry analysis, four healthy controls (Healthy) and three individuals who had been vaccinated in the past 2 to 3 days (Vaccine) were used as control. For RT-PCR, three healthy and three vaccinated individuals were used as control. **(A)** Histograms of CD107a expression in PBMC NK cells of the patient with COVID-19 mRNA vaccine-related myopericarditis. **(B)** CD4<sup>+</sup> and CD8<sup>+</sup> T cell frequencies among PBMC CD45<sup>+</sup> cells in the patient with COVID-19 vaccine-related myopericarditis. CD4<sup>+</sup> T cells were gated on CD45<sup>+</sup>CD3<sup>+</sup>CD4<sup>+</sup>, and CD8<sup>+</sup> T cells were gated on CD45<sup>+</sup>CD3<sup>+</sup>CD8<sup>+</sup> (Supplementary Figure 1). **(C,D)** Flow cytometry plots **(C)** and frequencies **(D)** of CD8<sup>+</sup> T cell subsets in the patient PBMC defined by CCR7<sup>+</sup>CD45RA<sup>+</sup> (T<sub>N</sub>; naïve), CCR7<sup>+</sup>CD45RA<sup>-</sup> (T<sub>CM</sub>; central memory), CCR7<sup>-</sup>CD45RA<sup>-</sup> (T<sub>EM</sub>; effector memory), and CCR7<sup>-</sup>CD45RA<sup>+</sup> (T<sub>EMRA</sub>; effector memory expressing CD45RA).

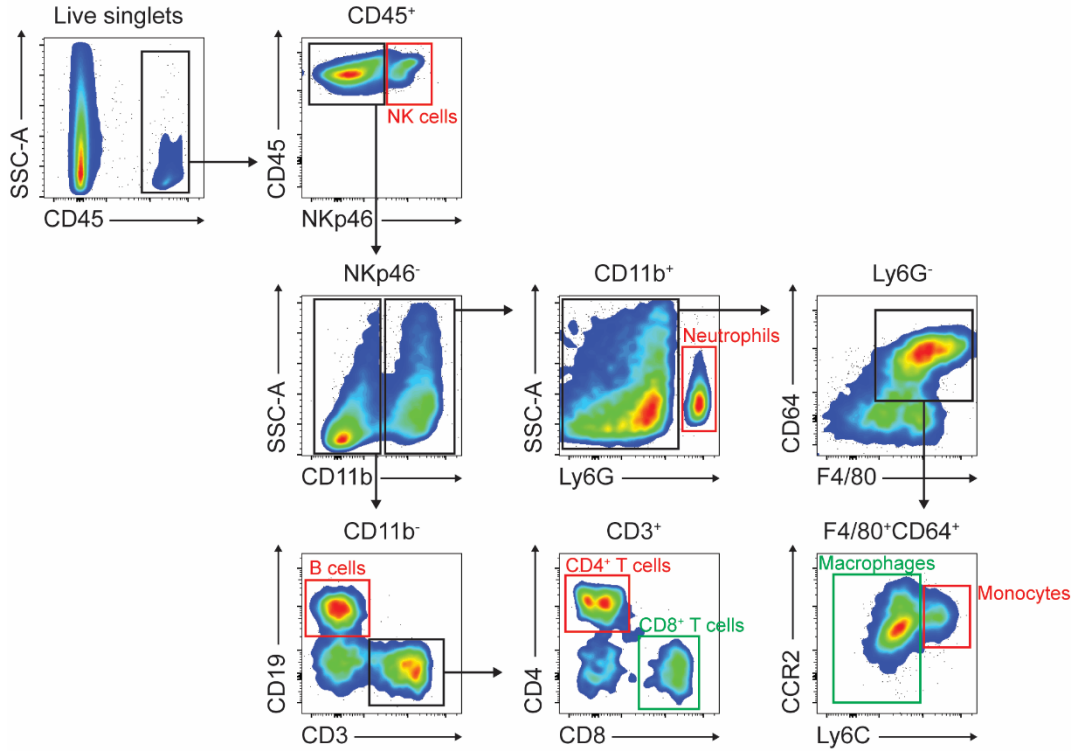

**Supplementary Figure 3.** Gating strategy for flow cytometry analysis of cardiac infiltrating immune cells from IL-18-injected mice.

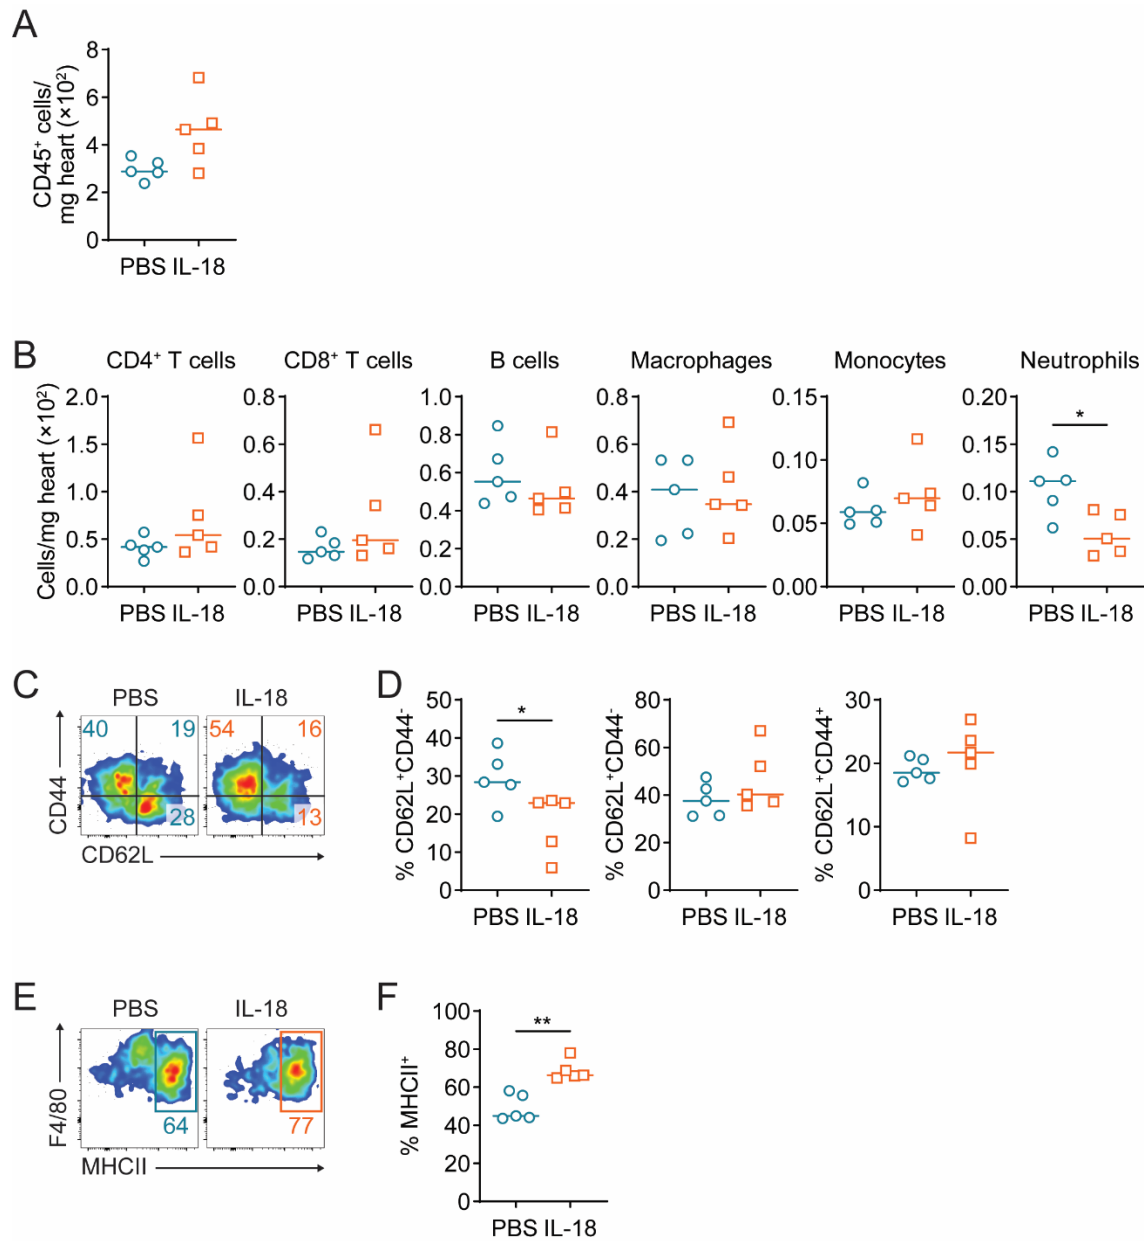

**Supplementary Figure 4.** Activated cardiac T cells and macrophages in IL-18-injected mice. Mice were intraperitoneally injected with recombinant IL-18 (n=5) or PBS (n=5) every other day for eight days. Mice were sacrificed on day 10. **(A)** Number of CD45<sup>+</sup> infiltrating cells in hearts of IL-18-injected analyzed by flow cytometry. P-value: 0.0687. **(B)** Number of CD4<sup>+</sup> T cells (CD45<sup>+</sup>NKp46<sup>-</sup>CD11b<sup>-</sup>CD3<sup>+</sup>CD4<sup>+</sup>), CD8<sup>+</sup> T cells (CD45<sup>+</sup>NKp46<sup>-</sup>CD11b<sup>-</sup>CD3<sup>+</sup>CD8<sup>+</sup>), B cells (CD45<sup>+</sup>NKp46<sup>-</sup>CD11b<sup>-</sup>CD19<sup>+</sup>), macrophages (CD45<sup>+</sup>NKp46<sup>-</sup>CD11b<sup>+</sup>Ly6G<sup>-</sup>F4/80<sup>+</sup>CD64<sup>+</sup>Ly6C<sup>-</sup>), monocytes (CD45<sup>+</sup>NKp46<sup>-</sup>CD11b<sup>+</sup>Ly6G<sup>-</sup>F4/80<sup>+</sup>CD64<sup>+</sup>Ly6C<sup>+</sup>CCR2<sup>+</sup>), and neutrophils (CD45<sup>+</sup>NKp46<sup>-</sup>CD11b<sup>+</sup>Ly6G<sup>+</sup>) in hearts of IL-18-injected mice. P-value: 0.0196 (neutrophil). **(C,D)** Flow cytometry plots **(C)** and frequencies **(D)** of CD8<sup>+</sup> T cell subsets defined by CD62L<sup>+</sup>CD44<sup>-</sup> (naïve), CD62L<sup>-</sup>CD44<sup>+</sup> (effector), and CD62L<sup>+</sup>CD44<sup>+</sup> (memory) in IL-18-injected mouse hearts. P-value: 0.0385 (left). **(E,F)** Flow cytometry plots **(E)** and frequencies **(F)**

of MHCII expression on macrophages in IL-18-injected mouse hearts. P-value: 0.0011. Student *t*-test was used for statistical analysis. \*P < 0.05; \*\*P < 0.005.

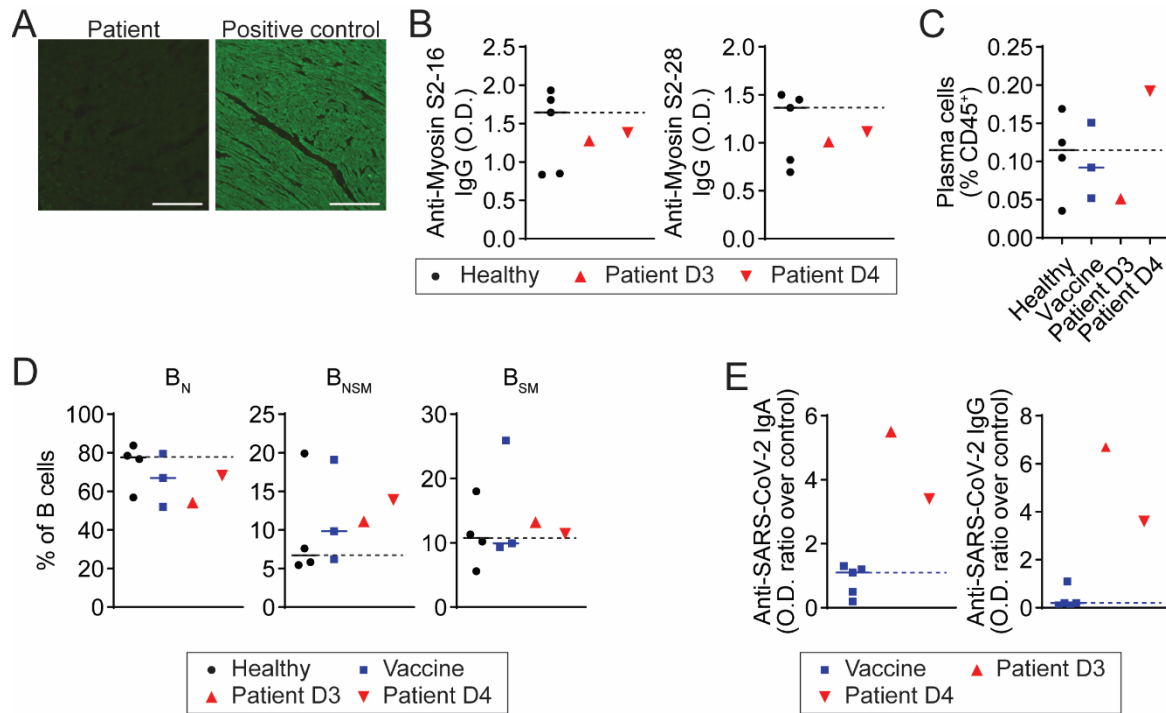

**Supplementary Figure 5.** No involvement of autoantibodies B cells in COVID-19 vaccine-related myopericarditis. **(A)** Representative image of indirect immunofluorescence assay for detecting anti-cardiac autoantibodies in the plasma of the patient with COVID-19 vaccine-related myopericarditis. The plasma was collected on day 3 after COVID-19 mRNA vaccine. Scale bars: 200  $\mu$ m. **(B)** Plasma levels of antibodies against myosin peptide S2-16 or S2-28 measured by ELISA in the patient with myopericarditis on days 3 (D3) and 4 (D4) after COVID-19 vaccination. As controls, five healthy controls (Healthy) were tested. **(C)** Frequencies of plasma cells among PBMC CD45<sup>+</sup> cells from the patient with COVID-19 vaccine-related myopericarditis. Plasma cells were gated on CD45<sup>+</sup>CD19<sup>+</sup>CD38<sup>+</sup>CD27<sup>+</sup> (Supplementary Figure 1). As controls, four healthy controls (Healthy) and three individuals who had been vaccinated in the past 2 to 3 days (Vaccine) were tested. **(D)** Frequencies of PBMC B cell subsets from the patient with COVID-19 vaccine-related myopericarditis defined by IgD<sup>+</sup>CD27<sup>-</sup> ( $B_N$ ; naïve), IgD<sup>+</sup>CD27<sup>+</sup> ( $B_{NSM}$ ; non-class-switched memory), and IgD<sup>-</sup>CD27<sup>+</sup> ( $B_{SM}$ ; class-switched memory). B cells were gated on CD45<sup>+</sup>CD19<sup>+</sup> (Supplementary Figure 1). **(E)** Plasma levels of IgA and IgG against SARS-CoV-2 spike protein measured by ELISA in the patient with myopericarditis on days 3 (D3) and 4 (D4) after COVID-19 vaccination. As controls, five controls who had been vaccinated in the past 2 to 3 days (Vaccine) were tested.
